# Supplementary material
Source: Elsevier journal article supplement (https://www.sciencedirect.com/science/article/pii/S0211563821001140)
Supplement: mmc1 [file S0211563821001140:mmc1.doc]

**ANEXO A**

**MATRIZ JUICIO DE EXPERTOS**

De acuerdo con los siguientes indicadores tomados de “Validez de Contenido y Juicio de Expertos: Una aproximación a su Utilización” [[1]](#footnote-1) y de “Validez y confiabilidad del cuestionario "Prácticas de cuidado que realizan consigo mismas las mujeres en el posparto"”[[2]](#footnote-2) solicitamos califique cada uno de los ítems según corresponda. Usted encontrará, además, una columna de “Observaciones”, en la que puede realizar alguna anotación de acuerdo al ítem según sea pertinente.

| **CATEGORÍA** | **CALIFICACIÓN** | **INDICADOR** |
| --- | --- | --- |
| **SUFICIENCIA**  Los ítems que pertenecen a una misma dimensión bastan para obtener la medición de ésta. | 1. No cumple con el criterio | Los ítems no son suficientes para medir la dimensión. |
| 1. Bajo Nivel | Los ítems miden algún aspecto de la dimensión pero no corresponden con la dimensión total. |
| 1. Moderado Nivel | Se deben incrementar algunos ítems para poder evaluar la dimensión completamente. |
| 1. Alto nivel | Los ítems son suficientes. |
| **CLARIDAD**  El ítem se comprende fácilmente, es decir, su sintáctica y semántica son adecuadas. | 1. No cumple con el criterio | El ítem no es claro |
| 1. Bajo Nivel | El ítem requiere bastantes modificaciones o una modificación muy grande en el uso de las palabras de acuerdo con su significado o por la ordenación de las mismas. |
| 1. Moderado Nivel | Se requiere una modificación muy específica de algunos de los términos del ítem. |
| 1. Alto nivel | El ítem es claro, tiene semántica y sintaxis adecuada. |
| **COHERENCIA**  El ítem tiene relación lógica con la dimensión o indicador que está midiendo. | 1. No cumple con el criterio | El ítem no tiene relación lógica con la dimensión. |
| 1. Bajo Nivel | El ítem tiene una relación tangencial con la dimensión. |
| 1. Moderado Nivel | El ítem tiene una relación moderada con la dimensión que está midiendo. |
| 1. Alto nivel | El ítem se encuentra completamente relacionado con la dimensión que está midiendo. |
| **RELEVANCIA**  El ítem es esencial o importante, es decir debe ser incluido. | 1. No cumple con el criterio | El ítem puede ser eliminado sin que se vea afectada la medición de la dimensión. |
| 1. Bajo Nivel | El ítem tiene alguna relevancia, pero otro ítem puede estar incluyendo lo que mide este. |
| 1. Moderado Nivel | El ítem es relativamente importante. |
| 1. Alto nivel | El ítem es muy relevante y debe ser incluido. |
| **PERTINENCIA**  El ítem evalúa lo que se pretende evaluar | 1. No cumple con el criterio | El ítem puede ser eliminado sin que se vea afectada la medición de la dimensión. |
| 1. Bajo Nivel | El ítem tiene alguna relevancia, pero otro ítem puede estar incluyendo lo que mide este. |
| 1. Moderado Nivel | El ítem es relativamente importante. |
| 1. Alto nivel | El ítem es muy relevante y debe ser incluido. |

**Caso LM-2017:**

Para dar cumplimiento al objetivo de investigación planteado, fue necesario construir un caso clínico que se evaluará por medio del examen clínico objetivo estructurado - ECOE utilizado como parte del contexto pedagógico para construir aprendizaje significativo a partir de la experiencia. El ECOE consta de seis dimensiones (estaciones): Anamnesis, test y medidas, ejecución de test, diagnóstico-pronóstico, práctica basada en la evidencia y Educación

| **EJEMPLO ESTACIÓN 1** | **SUFICIENCIA** | | | | **CLARIDAD** | | | | **COHERENCIA** | | | | **RELEVANCIA** | | | | **PERTINENCIA** | | | | **OBSERVACIONES** | |
| --- | --- | --- | --- | --- | --- | --- | --- | --- | --- | --- | --- | --- | --- | --- | --- | --- | --- | --- | --- | --- | --- | --- |
|  | 1 | 2 | 3 | 4 | 1 | 2 | 3 | 4 | 1 | 2 | 3 | 4 | 1 | 2 | 3 | 4 | 1 | 2 | 3 | 4 |  |
| **ECOE. Primera estación. Anamnesis.** |  |  |  |  |  |  |  |  |  |  |  |  |  |  |  |  |  |  |  |  |  |
| Saluda y se presenta a la paciente |  |  |  |  |  |  |  |  |  |  |  |  |  |  |  |  |  |  |  |  |  |
| Se muestra seguro y cordial con la paciente. |  |  |  |  |  |  |  |  |  |  |  |  |  |  |  |  |  |  |  |  |  |
| Pregunta datos personales: Nombre, edad, seguridad social, lugar de vivienda |  |  |  |  |  |  |  |  |  |  |  |  |  |  |  |  |  |  |  |  |  |
| Pregunta por la ocupación de la paciente |  |  |  |  |  |  |  |  |  |  |  |  |  |  |  |  |  |  |  |  |  |
| Pregunta por antecedentes personales, familiares, farmacológicos |  |  |  |  |  |  |  |  |  |  |  |  |  |  |  |  |  |  |  |  |  |
| Pregunta por actividades de ocio y hábitos de estilo de vida |  |  |  |  |  |  |  |  |  |  |  |  |  |  |  |  |  |  |  |  |  |
| Pregunta por el motivo de consulta |  |  |  |  |  |  |  |  |  |  |  |  |  |  |  |  |  |  |  |  |  |
| Pregunta por las expectativas que tiene la paciente |  |  |  |  |  |  |  |  |  |  |  |  |  |  |  |  |  |  |  |  |  |
| Pregunta sobre la presencia de Banderas Clínicas - rojas: Déficit neurológico extendido, Dolor torácico, Rigidez en miembros inferiores, Abuso de drogas/ SIDA, Edad <20 o > 55, Pérdida Inexplicable de peso, Fiebre, Restricción persistente a la flexión del tronco, Dolor constante y progresivo que se intensifica al dormir, Dolor al toser o estornudar, Historia previa de cáncer, Reciente historia de caídas. |  |  |  |  |  |  |  |  |  |  |  |  |  |  |  |  |  |  |  |  |  |
| Indaga si trae ayudas diagnósticas |  |  |  |  |  |  |  |  |  |  |  |  |  |  |  |  |  |  |  |  |  |
| En el formato entregado registro banderas clínicas-rojas explorados en la anamnesis |  |  |  |  |  |  |  |  |  |  |  |  |  |  |  |  |  |  |  |  |  |
| El formato entregado guarda aspectos de orto tipografía |  |  |  |  |  |  |  |  |  |  |  |  |  |  |  |  |  |  |  |  |  |

**PESOS DE ESTACIONES Y PESOS POR ÍTEMS**

A continuación, se presentan las dimensiones (estaciones) y baremos de cada una con los respectivos porcentajes de importancia asignados por el grupo investigador, con el propósito de ponerlos a su consideración, y establecer su nivel de acuerdo con los mismos (totalmente de acuerdo, medianamente de acuerdo o en desacuerdo), además, encontrará una columna de “Observaciones”, en la que puede realizar alguna anotación de acuerdo al ítem según sea pertinente:

|  | **Totalmente de acuerdo** | **Medianamente de acuerdo** | **Desacuerdo** | **Observaciones** |
| --- | --- | --- | --- | --- |
| **ECOE. Primera estación. Anamnesis. Peso = 17%** |  |  |  |  |
| **ECOE. Segunda estación. Test y medidas Peso = 14%** |  |  |  |  |
| **ECOE. Tercera estación. Ejecución de Test Peso = 19%** |  |  |  |  |
| **ECOE Cuarta estación. Diagnóstico y pronostico Peso =14%** |  |  |  |  |
| **ECOE Quinta estación. Practica Basada en la evidencia Peso =17%** |  |  |  |  |
| **ECOE Sexta estación. Educación Peso =19%** |  |  |  |  |

1. Escobar, J (2008). Validez de Contenido y Juicio de Expertos: Una aproximación a su Utilización. Avances en Medición. (6), 2-36. [↑](#footnote-ref-1)
2. Vargas Porras Carolina, Hernández Molina Luz Mery. Validez y confiabilidad del cuestionario "Prácticas de cuidado que realizan consigo mismas las mujeres en el posparto". Revista Avances en enfermería. 28 (1). 2010. p. 96-106. [↑](#footnote-ref-2)
